# Supplementary material for: Variation in Aquaporin and Physiological Responses Among Pinus contorta Families Under Different Moisture Conditions
Source: PubMed Central journal article supplement (PMC6359517; doi:10.3390/plants8010013), 2019-01-06
Supplement: plants-08-00013-s001.pdf [file plants-08-00013-s001.pdf]

**Table S1.** Results of a two-way ANOVA (family, drought and family × drought) for root:shoot, stomatal conductance, net photosynthesis, water use efficiency, and changes in height and diameter of eight *Pinus contorta* families displaying source of variation, F-value and *p*-value. Significant sources of variation are highlighted in bold.

| Source of Variation                | F-value | <i>p</i> -value  |
|------------------------------------|---------|------------------|
| <b>Root:Shoot</b>                  |         |                  |
| Family                             | 2.520   | <b>0.023</b>     |
| Drought                            | 0.760   | 0.388            |
| Family × Drought                   | 0.550   | 0.788            |
| <b>Stomatal conductance (gs)</b>   |         |                  |
| Family                             | 0.490   | 0.823            |
| Drought                            | 39.180  | <b>&lt;0.001</b> |
| Family × Drought                   | 1.360   | 0.314            |
| <b>Net photosynthesis (Pn)</b>     |         |                  |
| Family                             | 0.820   | 0.569            |
| Drought                            | 22.120  | <b>&lt;0.001</b> |
| Family × Drought                   | 0.780   | 0.605            |
| <b>Water use efficiency (iWUE)</b> |         |                  |
| Family                             | 0.660   | 0.703            |
| Drought                            | 70.320  | <b>&lt;0.001</b> |
| Family × Drought                   | 1.360   | 0.226            |
| <b>Changes in height</b>           |         |                  |
| Family                             | 2.220   | 0.049            |
| Drought                            | 0.080   | 0.775            |
| Family × Drought                   | 2.030   | 0.070            |
| <b>Changes in diameter</b>         |         |                  |
| Family                             | 1.49    | 0.194            |
| Drought                            | 9.73    | <b>0.003</b>     |
| Family × Drought                   | 1.30    | 0.269            |

**Table S2.** Results of two-way ANOVA (family, drought and family × drought) for relative gene expression of five aquaporin genes (*PiconPIP1;2*, *PiconPIP2;1*, *PiconPIP2;2*, *PiconPIP2;3*, and *PiconTIP1;1*) from eight families of *Pinus contorta* displaying source of variation, F-value and p-value. Significant sources of variation highlighted in bold.

| Source of Variation       | F-value | p-value          |
|---------------------------|---------|------------------|
| <b><i>PiconPIP1;2</i></b> |         |                  |
| Family                    | 27.45   | <b>&lt;0.001</b> |
| Drought                   | 30.05   | <b>&lt;0.001</b> |
| Family × Drought          | 1.30    | 0.283            |
| <b><i>PiconPIP2;1</i></b> |         |                  |
| Family                    | 25.23   | <b>&lt;0.001</b> |
| Drought                   | 4.47    | <b>0.042</b>     |
| Family × Drought          | 10.05   | <b>&lt;0.001</b> |
| <b><i>PiconPIP2;2</i></b> |         |                  |
| Family                    | 22.70   | <b>&lt;0.001</b> |
| Drought                   | 2.42    | 0.129            |
| Family × Drought          | 12.45   | <b>&lt;0.001</b> |
| <b><i>PiconPIP2;3</i></b> |         |                  |
| Family                    | 52.29   | <b>&lt;0.001</b> |
| Drought                   | 0.28    | 0.603            |
| Family × Drought          | 6.27    | <b>&lt;0.001</b> |
| <b><i>PiconTIP1;1</i></b> |         |                  |
| Family                    | 9.08    | <b>&lt;0.001</b> |
| Drought                   | 0.01    | 0.921            |
| Family × Drought          | 6.70    | <b>&lt;0.001</b> |

**Table S3.** Primer name and sequences for quantitative real-time PCR analysis of five aquaporins and two internal control genes.

| <b>Primer name</b>     | <b>Primer sequences</b>                                                      |
|------------------------|------------------------------------------------------------------------------|
| <i>Pine_ACT7</i>       | For: 5' - CCTTCCATCGTCCACAGAAA -3'<br>Rev: 5' - CCACCATCATCTCAAGCAAAC -3'    |
| <i>Pine_EF-1a</i>      | For: 5' - CTGCGGTCAAGAAGGGTAAA -3'<br>Rev: 5' - CTCGTGCATCAGAATCAGACA -3'    |
| <i>PinePIP1;2_qPCR</i> | For: 5' - GGACTGGTAACACCTGTGTATTG -3'<br>Rev: 5' - CAGATGGCTCTTGGCCTAAAT -3' |
| <i>PinePIP2;2_qPCR</i> | For: 5' - GTCAGTGTCTCAAGTCTGTAGG -3'<br>Rev: 5' - ATTCTCCTCACTGTTGCTACTT -3' |
| <i>PinePIP2;1_qPCR</i> | For: 5' - AAAGTCCAGGGTGATGATGAG -3'<br>Rev: 5' - CTGCTGCTACTGTGACTACAA -3'   |
| <i>PinePIP2;3_qPCR</i> | For: 5' - CAGGTGGACTTGTCTGTGTATC -3'<br>Rev: 5' - TTCTCTTACCGGTTTCTCATC -3'  |
| <i>PineTIP1;1_qPCR</i> | For: 5' - GCGTATCTACGAGCTGTTA -3'<br>Rev: 5' - GCCCTGTAAGAAGCCACTTTA -3'     |

**Table S4.** Aquaporin gene and primer sequences for cloning five aquaporin genes.

| <b>Gene</b>        | <b>Primer sequences</b>                                                               |
|--------------------|---------------------------------------------------------------------------------------|
| <i>PiconPIP1;2</i> | For: 5' - ATGGCGACTTTCCTGTTTCTTT -3'<br>Rev: 5' - CTAGGAGCGAGTTTTGAAGGG -3            |
| <i>PiconPIP2;1</i> | For: 5' - ATGACAAAGGAAGAAAGGAAGGA -3'<br>Rev: 5' - TTACACATTTGCGTTGCTTCG -3'          |
| <i>PiconPIP2;2</i> | For: 5' - ATGGCTAAGGAAGGTGGCAA -3'<br>Rev: 5' - GGGTTGCTGCGGAAGGAT -3'                |
| <i>PiconPIP2;3</i> | For: 5' - ATGATAAATGAAGAAGGAGCTGTATCGG -3'<br>Rev: 5' - TTACGCATTAACGTTGCCTCGGAAC -3' |
| <i>PiconTIP1;1</i> | For: 5' - ATGCCGTTCCGAGGAATTGC -3'<br>Rev: 5' - TCAGTACTCGTTCGAGGGCAAC -3'            |

**Table S5.** Primer name and sequences for 3' rapid amplification of cDNA ends (RACE).

| <b>Primer name</b>      | <b>Primer sequences</b>                                            |
|-------------------------|--------------------------------------------------------------------|
| 3'-RACE-Q0              | 5' - CCAGTGAGCAGAGTGACG -3'                                        |
| 3'-RACE-Q1              | 5' - GAGGACTCGAGCTCAAGC -3'                                        |
| 3'-RACE-QT              | 5' - CCAGTGAGCAGAGTGACGAGGACTCG<br>AGCTCAAGCTTTTTTTTTTTTTTTTTT -3' |
| <i>PiconPIP2;3-GSP1</i> | 5' - CTGCCGCTGATCTCATTGAC -3'                                      |
| <i>PiconPIP2;3-GSP2</i> | 5' - TTGGTTTACTGCACTGCTGG -3'                                      |
| <i>PiconPIP2;1-GSP1</i> | 5' - AGAAGTTGAGCAGCAGGGAT -3'                                      |
| <i>PiconPIP2;1-GSP2</i> | 5' - ATGTGGCCAAGGACTACACA -3'                                      |
